# Supplementary material for: Complete deconvolution of cellular mixtures based on linearity of transcriptional signatures
Source: PubMed Central journal article supplement (PMC6525259; doi:10.1038/s41467-019-09990-5), 2019-05-17
Supplement: 41467_2019_9990_MOESM2_ESM.pdf [file 41467_2019_9990_MOESM2_ESM.pdf]

## **Description of Additional Supplementary Files**

File Name: Supplementary Data 1

Description: 3 gene sets of mutually linear genes from analysis from Fig. 1.

File Name: Supplementary Data 2

Description: Collinearity network of TCGA HNSCC dataset presented in Fig. 2.
